# Supplementary material for: Neuroligin 1 regulates autistic-like repetitive behavior through modulating the excitability of striatal D2 expressing medium spiny neurons
Source: Research Square preprint supplement (doi:10.21203/rs.3.rs-4113756/v1), 2024-07-11
Supplement: Supplementary file 1 [file 17c687f244674707f978d6f9.xlsx]

## Sheet: Extended Fig. 1
	TEST USED	n	DESCRIPTIVE STATS		P VALUE
Extended Fig. 1A	Two-way ANOVA followed Fisher's LSD post hoc test	7 mice/ WT-Male, 7 mice/ Het-Male, 7 mice/ KO-Male, 8 mice/ WT-Female, 8 mice/ Het-Female, 8 mice/ KO-Female	error bars are mean ± SEM	WT-Male = 14.310 ± 1.362, Het-Male = 42.100 ± 8.584, KO-Male = 43.770 ± 5.709, WT-Female = 23.250 ± 1.625, Het-Female = 44.180 ± 4.543, KO-Female = 41.300 ± 2.842	WT-Male VS Het-Male p = 0.0001, WT-Male VS KO-Male p < 0.0001, WT-Female VS Het-Female p = 0.0007, WT-Female VS KO-Female p = 0.0048
Extended Fig. 1B	Two-way ANOVA followed Fisher's LSD post hoc test	7 mice/ WT-Male, 7 mice/ Het-Male, 7 mice/ KO-Male, 8 mice/ WT-Female, 8 mice/ Het-Female, 8 mice/ KO-Female	error bars are mean ± SEM	WT-Male = 2.714 ± 0.360, Het-Male = 5.571 ± 0.481, KO-Male = 6.143 ± 0.738, WT-Female = 3.375 ± 0.263, Het-Female = 5.375 ± 0.461, KO-Female = 5.250 ± 0.313	WT-Male VS Het-Male p = 0.0001, WT-Male VS KO-Male p < 0.0001, WT-Female VS Het-Female p = 0.0013, WT-Female VS KO-Female p = 0.0044
Extended Fig. 1C	Two-way ANOVA followed Fisher's LSD post hoc test	8 mice/ WT-Male, 8 mice/ Het-Male, 8 mice/ KO-Male, 8 mice/ WT-Female, 7 mice/ Het-Female, 8 mice/ KO-Female	error bars are mean ± SEM	WT-Male = 38.880 ± 4.400, Het-Male = 66.600 ± 5.105, KO-Male = 70.500 ± 4.791, WT-Female = 42.280 ± 5.156, Het-Female = 73.980 ± 6.400, KO-Female = 59.270 ± 7.252	WT-Male VS Het-Male p = 0.0006, WT-Male VS KO-Male p = 0.0001, WT-Female VS Het-Female p = 0.0002, WT-Female VS KO-Female p = 0.0086
Extended Fig. 1D	Two-way ANOVA followed Fisher's LSD post hoc test	8 mice/ WT-Male, 8 mice/ Het-Male, 8 mice/ KO-Male, 8 mice/ WT-Female, 7 mice/ Het-Female, 8 mice/ KO-Female	error bars are mean ± SEM	WT-Male = 11.380 ± 1.101, Het-Male = 18.250 ± 1.509, KO-Male = 22.500 ± 2.044, WT-Female = 11.880 ± 1.674, Het-Female = 21.000 ± 1.447, KO-Female = 17.250 ± 1.770	WT-Male VS Het-Male p = 0.0031, WT-Male VS KO-Male p < 0.0001, WT-Female VS Het-Female p = 0.0003, WT-Female VS KO-Female p = 0.0048
Extended Fig. 1F	one-way ANOVA followed Fisher's LSD post hoc test	12 mice/ Control, 8 mice/ mPFC, 8 mice/ OFC, 10 mice/ striatum, 9 mice/ PVH, 9 mice/ CeA	error bars are mean ± SEM	Control = 20.670 ± 2.320, mPFC = 20.470 ± 3.211, OFC = 26.430 ± 3.505, Striatum = 41.100 ± 3.879, CeA = 20.190 ± 2.840, PVH = 13.780 ± 2.246	Control VS mPFC p = 0.9618, Control VS OFC p = 0.1791, Control VS Striatum p < 0.0001, Control VS CeA p = 0.9068, Control VS PVH p = 0.0972
Extended Fig. 1G	one-way ANOVA followed Fisher's LSD post hoc test	12 mice/ Control, 7 mice/ mPFC, 9 mice/ OFC, 9 mice/ striatum, 9 mice/ PVH, 8 mice/ CeA	error bars are mean ± SEM	Control = 37.840 ± 4.666, mPFC = 39.440 ± 6.532, OFC = 36.690 ± 6.207, Striatum = 63.150 ± 8.318, CeA = 51.650 ± 6.687, PVH = 41.250 ± 5.111	Control VS mPFC p = 0.8595, Control VS OFC p = 0.8907, Control VS Striatum p = 0.0038, Control VS CeA p = 0.1037, Control VS PVH p = 0.6942
Extended Fig. 1I	Unpaired two-tailed t-test	12 mice/ group	error bars are mean ± SEM	Scramble = 26.100 ± 2.578, NLG1 sh = 47.790 ± 45.654	p = 0.0011
Extended Fig. 1J	Unpaired two-tailed t-test	12 mice/ group	error bars are mean ± SEM	Scramble = 3.583 ± 0.435, NLG1 sh = 5.750 ± 0.463	p = 0.0025
Extended Fig. 1K	Unpaired two-tailed t-test	12 mice/ group	error bars are mean ± SEM	Scramble = 7.906 ± 0.723, NLG1 sh = 8.292 ± 0.592	p = 0.6840
Extended Fig. 1L	Unpaired two-tailed t-test	8 mice/ Scramble, 10 mice/ NLG1 sh	error bars are mean ± SEM	Scramble = 44.040 ± 4.632, NLG1 sh = 72.550 ± 4.702	p = 0.0006
Extended Fig. 1M	Unpaired two-tailed t-test	8 mice/ Scramble, 10 mice/ NLG1 sh	error bars are mean ± SEM	Scramble = 11.630 ± 1.349, NLG1 sh = 17.000 ± 1.366	p = 0.0140
Extended Fig. 1N	Unpaired two-tailed t-test	8 mice/ Scramble, 10 mice/ NLG1 sh	error bars are mean ± SEM	Scramble = 3.891 ± 0.369, NLG1 sh = 4.435 ± 0.336	p = 0.2927
Extended Fig. 1O	Unpaired two-tailed t-test	10 mice/ group	error bars are mean ± SEM	Scramble = 3839.000 ± 229.200, NLG1 sh = 3735.000 ± 290.400	p = 0.7826
Extended Fig. 1P	Unpaired two-tailed t-test	10 mice/ group	error bars are mean ± SEM	Scramble = 6.401 ± 0.383, NLG1 sh = 6.232 ± 0.485	p = 0.7875
Extended Fig. 1Q	Unpaired two-tailed t-test	10 mice/ group	error bars are mean ± SEM	Scramble = 63.510 ± 2.427, NLG1 sh = 61.070 ± 3.025	p = 0.5375
Extended Fig. 1R	Unpaired two-tailed t-test	10 mice/ group	error bars are mean ± SEM	Scramble = 33.260 ± 4.997, NLG1 sh = 28.780 ± 4.951	p = 0.5326
Extended Fig. 1S	Unpaired two-tailed t-test	10 mice/ group	error bars are mean ± SEM	Scramble = 21.400 ± 3.099, NLG1 sh = 17.300 ± 2.468	p = 0.3144
Extended Fig. 1T	Two-way ANOVA followed Fisher's LSD post hoc test	9 mice/ group	error bars are mean ± SEM	E-Scramble = 29.600 ± 3.289, S1-Scramble = 83.460 ± 12.930, E-NLG1 sh = 37.940 ± 4.264, S1-NLG1 sh = 97.720 ± 12.050	E VS S1 (Scramble p = 0.0007), E VS S1 （NLG1 sh p = 0.0003）
Extended Fig. 1U	Two-way ANOVA followed Fisher's LSD post hoc test	9 mice/ group	error bars are mean ± SEM	S1-Scramble = 49.590 ± 6.008, S2-mCherry = 81.430 ± 9.877, S1-NLG1 sh = 43.760 ± 3.830, S2-NLG1 sh = 91.480 ± 7.170	S1 VS S2 (Scramble p = 0.0032), S1 VS S2 (NLG1 sh p < 0.0001)

## Sheet: Extended Fig. 2
	TEST USED	n	DESCRIPTIVE STATS		P VALUE
Extended Fig. 2A	Unpaired two-tailed t-test	13 mice/ Scramble, 14 mice/ NLG1 sh	error bars are mean ± SEM	Scramble = 6.676 ± 0.661, NLG1 sh = 7.887 ± 0.658	p = 0.2062
Extended Fig. 2B	Unpaired two-tailed t-test	13 mice/ Scramble, 14 mice/ NLG1 sh	error bars are mean ± SEM	Scramble = 3.126 ± 0.234, NLG1 sh = 3.791 ± 0.230	p = 0.0539
Extended Fig. 2C	Unpaired two-tailed t-test	9 mice/ group	error bars are mean ± SEM	Scramble = 8.589 ± 0.603 NLG1 sh = 10.66 ± 1.415	p = 0.197
Extended Fig. 2D	Unpaired two-tailed t-test	9 mice/ group	error bars are mean ± SEM	Scramble = 3.011 ± 0.3479, NLG1 sh = 2.981 ± 0.229	p = 0.9428
Extended Fig. 2F	Unpaired two-tailed t-test	9 mice/ group	error bars are mean ± SEM	Scramble = 26.850 ± 2.308, NLG1 sh = 25.580 ± 3.687	p = 0.7748
Extended Fig. 2G	Unpaired two-tailed t-test	9 mice/ group	error bars are mean ± SEM	Scramble = 42.140 ± 5.976, NLG1 sh = 39.800 ± 3.409	p = 0.7318
Extended Fig. 2H	Unpaired two-tailed t-test	9 mice/ GFP, 10 mice/ OE	error bars are mean ± SEM	GFP = 9.758 ± 0.855, OE = 7.647 ± 0.992	p = 0.1294
Extended Fig. 2I	Unpaired two-tailed t-test	10 mice/ GFP, 9 mice/ OE	error bars are mean ± SEM	GFP = 3.319 ± 0.420, OE = 3.364 ± 0.481	p = 0.9452

## Sheet: Extended Fig. 3
	TEST USED	n	DESCRIPTIVE STATS		P VALUE
Extended Fig. 3A	Unpaired two-tailed t-test	12 events/ WT, 13 nevents/ KO	error bars are mean ± SEM	WT = 0.695 ± 0.017, KO = 0.680 ± 0.029	p = 0.6609
Extended Fig. 3B	Unpaired two-tailed t-test	12 events/ WT, 13 nevents/ KO	error bars are mean ± SEM	WT = 0.460 ± 0.023, KO = 0.424 ± 0.026	p = 0.3152
Extended Fig. 3C	Unpaired two-tailed t-test	12 events/ WT, 13 nevents/ KO	error bars are mean ± SEM	WT = 0.547 ± 0.026, KO = 0.515 ± 0.030	p = 0.4406
Extended Fig. 3D	Unpaired two-tailed t-test	8 mice/ Saline, 7 mice/ CNQX+APV	error bars are mean ± SEM	Saline = 51.740 ± 9.446 CNQX+APV = 52.200 ± 8.434	p = 0.9723
Extended Fig. 3E	Unpaired two-tailed t-test	8 mice/ Saline, 7 mice/ CNQX+APV	error bars are mean ± SEM	Saline = 54.390 ± 6.326 CNQX+APV = 64.480 ± 5.885	p = 0.2683
Extended Fig. 3F	Unpaired two-tailed t-test	11 mice/ group	error bars are mean ± SEM	Saline = 26.880 ± 3.581, CNQX+APV = 41.150 ± 5.930	p = 0.0527
Extended Fig. 3G	Unpaired two-tailed t-test	10 mice/ group	error bars are mean ± SEM	Saline = 31.610 ± 6.054, CNQX+APV = 36.150 ± 4.038	p = 0.5404
Extended Fig. 3I	Repeated two-way ANOVA followed Fisher's LSD post hoc test	10 neurons/ 3 scramble mice, 8 neurons/ 3 NLG1 sh mice	error bars are mean ± SEM	0 pA (Scranble = 0.000 ± 0.000, NLG1 sh = 0.000 ± 0.000), 50 pA(Scranble = 0.200 ± 0.200, NLG1 sh = 0.000 ± 0.000), 100 pA(Scranble = 4.800 ± 1.954, NLG1 sh = 8.250 ± 2.724), 150 pA(Scranble = 11.400 ± 3.034, NLG1 sh = 18.250 ± 2.821), 200 pA(Scranble = 16.800 ± 2.444, NLG1 sh = 30.250 ± 3.369)	50 pA (Scramble VS NLG1 sh p = 0.3434), 100 pA (Scramble VS NLG1 sh p = 0.3217), 150 pA (Scramble VS NLG1 sh p = 0.1177), 200 pA (Scramble VS NLG1 sh p = 0.0063)

## Sheet: Extended Fig. 4
	TEST USED	n	DESCRIPTIVE STATS		P VALUE
Extended Fig. 4B	Unpaired two-tailed t-test	10 mice/ group	error bars are mean ± SEM	mCherry = 25.350 ± 3.706, hM4D = 23.100 ± 1.909	p = 0.5948
Extended Fig. 4C	Unpaired two-tailed t-test	10 mice/ group	error bars are mean ± SEM	mCherry = 45.220 ± 6.346, hM4D = 48.330 ± 4.832	p = 0.7013
Extended Fig. 4D	Paired two-tailed t-test	10 mice/ group	error bars are mean ± SEM	Saline = 10.700 ± 1.070, CNO = 7.959 ± 1.095	p = 0.1307
Extended Fig. 4E	Paired two-tailed t-test	9 mice/ group	error bars are mean ± SEM	Saline = 4.175 ± 0.292 CNO = 4.253 ± 0.412	p = 0.8245
Extended Fig. 4F	Unpaired two-tailed t-test	9 mice/ group	error bars are mean ± SEM	mCherry = 5.747 ± 0.463, hM3D = 7.281 ± 1.067	p = 0.2060
Extended Fig. 4G	Unpaired two-tailed t-test	10 mice/ group	error bars are mean ± SEM	mCherry = 3.287 ± 0.323, hM3D = 3.369 ± 0.344	p = 0.8474
Extended Fig. 4H	Unpaired two-tailed t-test	9 mice/ mCherry, 10 mice/ hM3D	error bars are mean ± SEM	mCherry = 25.110 ± 3.848, hM3D = 54.930 ± 9.250	p = 0.0109
Extended Fig. 4I	Unpaired two-tailed t-test	9 mice/ mCherry, 10 mice/ hM3D	error bars are mean ± SEM	mCherry = 3.000 ± 0.500, hM3D = 5.000 ± 0.577	p = 0.0191
Extended Fig. 4J	Unpaired two-tailed t-test	9 mice/ mCherry, 10 mice/ hM3D	error bars are mean ± SEM	mCherry = 9.064 ± 1.180, hM3D = 10.850 ± 1.274	p = 0.3208
Extended Fig. 4K	Unpaired two-tailed t-test	9 mice/ mCherry, 10 mice/ hM3D	error bars are mean ± SEM	mCherry = 50.250 ± 3.085, hM3D = 40.330 ± 2.910	p = 0.0318
Extended Fig. 4L	Unpaired two-tailed t-test	10 mice/ group	error bars are mean ± SEM	mCherry = 37.390 ± 5.550, hM3D = 45.470 ± 5.460	p = 0.3130
Extended Fig. 4M	Unpaired two-tailed t-test	10 mice/ group	error bars are mean ± SEM	mCherry = 11.500 ± 1.734, hM3D = 12.400 ± 1.166	p = 0.6718
Extended Fig. 4N	Unpaired two-tailed t-test	10 mice/ group	error bars are mean ± SEM	mCherry = 3.285 ± 0.317, hM3D = 3.794 ± 0.439	p = 0.3605

## Sheet: Extended Fig. 5
	TEST USED	n	DESCRIPTIVE STATS		P VALUE
Extended Fig. 5B	Unpaired two-tailed t-test	7 mice/ mCherry, 9 mice/ ChR2	error bars are mean ± SEM	mCherry = 50.660 ± 10.490, ChR2 = 52.870 ± 8.237	p = 0.8685
Extended Fig. 5C	Unpaired two-tailed t-test	7 mice/ mCherry, 9 mice/ ChR2	error bars are mean ± SEM	mCherry = 28.500 ± 4.962, ChR2 = 41.000 ± 6.065	p = 0.1485
Extended Fig. 5D	Unpaired two-tailed t-test	7 mice/ mCherry, 9 mice/ ChR2	error bars are mean ± SEM	mCherry = 29.240 ± 5.191, ChR2 = 31.660 ± 3.924	p = 0.7098
Extended Fig. 5E	Unpaired two-tailed t-test	7 mice/ mCherry, 9 mice/ ChR2	error bars are mean ± SEM	mCherry = 29.440 ± 5.930, ChR2 = 39.010 ± 3.981	p = 0.1863
Extended Fig. 5F	Unpaired two-tailed t-test	7 mice/ mCherry, 9 mice/ ChR2	error bars are mean ± SEM	mCherry = 73.280 ± 6.792, ChR2 = 71.320 ± 6.574	p = 0.8407
Extended Fig. 5G	Unpaired two-tailed t-test	7 mice/ mCherry, 9 mice/ ChR2	error bars are mean ± SEM	mCherry = 68.550 ± 6.721, ChR2 = 60.910 ± 6.091	p = 0.4152
Extended Fig. 5H	Unpaired two-tailed t-test	7 mice/ mCherry 9 mice/ ChR2	error bars are mean ± SEM	mCherry = 58.280 ± 4.173, ChR2 = 59.820 ± 6.588	p = 0.8567
Extended Fig. 5I	Unpaired two-tailed t-test	7 mice/ mCherry 9 mice/ ChR2	error bars are mean ± SEM	mCherry = 68.990 ± 5.396, ChR2 = 67.620 ± 5.107	p = 0.8580

## Sheet: Extended Fig. 6
	TEST USED	n	DESCRIPTIVE STATS	P VALUE
Extended Fig. 6A	Correlation matrix analysis	5 events	error bars are mean ± SEM	r2 = 0.0313, p = 0.7759
Extended Fig. 6B	Correlation matrix analysis	5 events	error bars are mean ± SEM	r2 = 0.2771, p = 0.3622
Extended Fig. 6C	Correlation matrix analysis	5 events	error bars are mean ± SEM	r2 = 0.0131, p = 0.8549
Extended Fig. 6D	Correlation matrix analysis	5 events	error bars are mean ± SEM	r2 = 0.2184, p = 0.4274
Extended Fig. 6E	Correlation matrix analysis	5 events	error bars are mean ± SEM	r2 = 0.7938, p = 0.0425
Extended Fig. 6F	Correlation matrix analysis	5 events	error bars are mean ± SEM	r2 = 0.3419, p = 0.3004
Extended Fig. 6G	Correlation matrix analysis	5 events	error bars are mean ± SEM	r2 = 0.8608, p = 0.0230
Extended Fig. 6H	Correlation matrix analysis	5 events	error bars are mean ± SEM	r2 = 0.3234, p = 0.3171

## Sheet: Extended Fig. 7
	TEST USED	n	DESCRIPTIVE STATS		P VALUE
Extended Fig. 7A	Unpaired two-tailed t-test	8 mice/ group	error bars are mean ± SEM	Saline = 11.48 ± 2.043, Go6983 = 9.535 ± 1.118	p = 0.4165
Extended Fig. 7B	Unpaired two-tailed t-test	8 mice/ group	error bars are mean ± SEM	Saline = 3.008 ± 0.2815, Go6983 = 2.830 ± 0.4403	p = 0.7385
Extended Fig. 7C	Unpaired two-tailed t-test	8 mice/ group	error bars are mean ± SEM	Saline = 32.54 ± 5.098, Go6983 = 27.69 ± 3.543	p = 0.4469
Extended Fig. 7D	Unpaired two-tailed t-test	8 mice/ group	error bars are mean ± SEM	Saline = 38.60 ± 6.244, Go6983 = 34.27 ± 6.608	p = 0.6409
