# Supplementary material for: Neuroligin 1 regulates autistic-like repetitive behavior through modulating the excitability of striatal D2 expressing medium spiny neurons
Source: Research Square preprint supplement (doi:10.21203/rs.3.rs-4113756/v1), 2024-07-11
Supplement: Supplementary file 2 [file 2aee78db6d34d0d3bcf6d63a.xlsx]

## Sheet: Fig. 1
	TEST USED	n	DESCRIPTIVE STATS		P VALUE
Fig. 1C	Two-way ANOVA followed Fisher's LSD post hoc test	15 mice/ group	error bars are mean ± SEM	WT = 19.080 ± 1.580, NLG1 Het = 43.210 ± 4.507, NLG1 KO = 42.450 ± 2.963	WT VS NLG1 Het p < 0.0001, WT VS NLG1 KO p < 0.0001, NLG1 Het VS NLG1 KO p = 0.7938
Fig. 1D	Two-way ANOVA followed Fisher's LSD post hoc test	15 mice/ group	error bars are mean ± SEM	WT = 3.067 ± 0.228, NLG1 Het = 5.467 ± 0.322, NLG1 KO = 5.667 ± 0.386	WT VS NLG1 Het p < 0.0001, WT VS NLG1 KO p < 0.0001, NLG1 Het VS NLG1 KO p = 0.8446
Fig. 1E	Two-way ANOVA followed Fisher's LSD post hoc test	15 mice/ group	error bars are mean ± SEM	WT = 6.351 ± 0.403, NLG1 Het = 7.814 ± 0.555, NLG1 KO = 7.751 ± 0.619	WT VS NLG1 Het p = 0.1046, WT VS NLG1 KO p = 0.0851, NLG1 Het VS NLG1 KO p = 0.9511
Fig. 1F	Two-way ANOVA followed Fisher's LSD post hoc test	16 mice/ WT, 15 mice/ NLG1 Het, 16 mice/ NLG1 KO	error bars are mean ± SEM	WT = 40.580 ± 3.304, NLG1 Het = 70.040 ± 4.014, NLG1 KO = 64.880 ± 4.441	WT VS NLG1 Het p < 0.0001, WT VS NLG1 KO p < 0.0001, NLG1 Het VS NLG1 KO p = 0.6650
Fig. 1G	Two-way ANOVA followed Fisher's LSD post hoc test	16 mice/ WT, 15 mice/ NLG1 Het, 16 mice/ NLG1 KO	error bars are mean ± SEM	WT = 11.630 ± 0.970, NLG1 Het = 19.530 ± 1.077, NLG1 KO = 19.880 ± 1.472	WT VS NLG1 Het p < 0.0001, WT VS NLG1 KO p < 0.0001, NLG1 Het VS NLG1 KO p = 0.3421
Fig. 1H	Two-way ANOVA followed Fisher's LSD post hoc test	16 mice/ WT, 15 mice/ NLG1 Het, 16 mice/ NLG1 KO	error bars are mean ± SEM	WT = 3.566 ± 0.170, NLG1 Het = 3.631 ± 0.143, NLG KO = 3.368 ± 0.177	WT VS NLG1 Het p = 0.6008, WT VS NLG1 KO p = 0.2112, NLG1 Het VS NLG1 KO p = 0.0886
Fig. 1K	Unpaired two-tailed t-test	4 mice/ group	error bars are mean ± SEM	Scramble = 1.000 ± 0.000, NLG1 sh = 0.780 ± 0.041	p = 0.0016
Fig. 1L1	Unpaired two-tailed t-test	14 mice/ group	error bars are mean ± SEM	Scramble = 21.810 ± 2.097, NLG1 sh = 47.370 ± 4.407	p < 0.0001
Fig. 1L2	Unpaired two-tailed t-test	14 mice/ group	error bars are mean ± SEM	Scramble = 3.286 ± 0.266, NLG1 sh = 6.000 ± 0.655	p = 0.0007
Fig. 1L3	Unpaired two-tailed t-test	14 mice/ group	error bars are mean ± SEM	Scramble = 6.711 ± 0.529, NLG1 sh = 8.194 ± 0.5055	p = 0.0531
Fig. 1M1	Unpaired two-tailed t-test	12 mice/ Scramble 13 mice/ NLG1 sh	error bars are mean ± SEM	Scramble = 30.630 ± 3.619, NLG1 sh = 49.92 ± 5.248	p = 0.0067
Fig. 1M2	Unpaired two-tailed t-test	12 mice/ Scramble 13 mice/ NLG1 sh	error bars are mean ± SEM	Scramble = 10.500 ± 1.070, NLG1 sh = 14.460 ± 1.509	p = 0.0460
Fig. 1M3	Unpaired two-tailed t-test	12 mice/ Scramble 13 mice/ NLG1 sh	error bars are mean ± SEM	Scramble = 2.894 ± 0.179, NLG1 sh = 3.540 ± 0.278	p = 0.0679
Fig. 1O1	Unpaired two-tailed t-test	9 mice/ Scramble, 8 mice/ NLG1 sh	error bars are mean ± SEM	Scramble = 18.780 ± 1.366, NLG1 sh = 22.230 ± 2.228	p = 0.1953
Fig. 1O2	Unpaired two-tailed t-test	9 mice/ Scramble, 8 mice/ NLG1 sh	error bars are mean ± SEM	Scramble = 2.667 ± 0.289, NLG1 sh = 3.500 ± 0.423	p = 0.1176
Fig. 1O3	Unpaired two-tailed t-test	9 mice/ Scramble, 8 mice/ NLG1 sh	error bars are mean ± SEM	Scramble = 7.409 ± 0.547, NLG1 sh = 6.580 ± 0.494	p = 0.2833
Fig. 1P1	Unpaired two-tailed t-test	9 mice/ Scramble, 8 mice/ NLG1 sh	error bars are mean ± SEM	Scramble = 41.010 ± 2.968, NLG1 sh = 36.060 ± 3.912	p = 0.3229
Fig. 1P2	Unpaired two-tailed t-test	9 mice/ Scramble, 8 mice/ NLG1 sh	error bars are mean ± SEM	Scramble = 16.670 ± 2.007, NLG1 sh = 13.500 ± 1.414	p = 0.2273
Fig. 1P3	Unpaired two-tailed t-test	9 mice/ Scramble, 8 mice/ NLG1 sh	error bars are mean ± SEM	Scramble = 2.682 ± 0.377 NLG1 sh = 2.591 ± 0.244	p = 0.8457
Fig. 1S	Unpaired two-tailed t-test	4 mice/ group	error bars are mean ± SEM	Scramble = 1.000 ± 0.000, NLG1 sh = 0.759 ± 0.031	p = 0.0002
Fig. 1T1	Unpaired two-tailed t-test	15 mice/ Scramble, 14 mice/ NLG1 sh	error bars are mean ± SEM	Scramble = 21.290 ± 1.547, NLG1 sh = 46.210 ± 4.819	p < 0.0001
Fig. 1T2	Unpaired two-tailed t-test	15 mice/ Scramble, 14 mice/ NLG1 sh	error bars are mean ± SEM	Scramble = 3.333 ± 0.347, NLG1 sh = 5.786 ± 0.435	p = 0.0001
Fig. 1T3	Unpaired two-tailed t-test	15 mice/ Scramble, 14 mice/ NLG1 sh	error bars are mean ± SEM	Scramble = 6.840 ± 0.461, NLG1 sh = 7.912 ± 0.595	p = 0.1623
Fig. 1U1	Unpaired two-tailed t-test	12 mice/ group	error bars are mean ± SEM	Scramble = 36.520 ± 4.273, NLG1 sh = 56.900 ± 2.906	p = 0.0007
Fig. 1U2	Unpaired two-tailed t-test	12 mice/ group	error bars are mean ± SEM	Scramble = 10.830 ± 1.284, NLG1 sh = 14.580 ± 0.933	p = 0.0274
Fig. 1U3	Unpaired two-tailed t-test	12 mice/ group	error bars are mean ± SEM	Scramble = 3.414 ± 0.210, NLG1 sh = 3.994 ± 0.206	p = 0.0616

## Sheet: Fig. 2
	TEST USED	n	DESCRIPTIVE STATS		P VALUE
Fig. 2B	Unpaired two-tailed t-test	13 mice/ Scramble, 14 mice/ NLG1 sh	error bars are mean ± SEM	Scramble = 19.070 ± 2.702, NLG1 sh = 40.130 ± 3.678	p = 0.0001
Fig. 2C	Unpaired two-tailed t-test	13 mice/ Scramble, 14 mice/ NLG1 sh	error bars are mean ± SEM	Scramble = 2.846 ± 0.317, NLG1 sh = 5.214 ± 0.395	p < 0.0001
Fig. 2D	Unpaired two-tailed t-test	13 mice/ Scramble, 14 mice/ NLG1 sh	error bars are mean ± SEM	Scramble = 54.780 ± 2.942, NLG1 sh = 49.920 ± 2.380	p = 0.2078
Fig. 2E	Unpaired two-tailed t-test	13 mice/ Scramble, 14 mice/ NLG1 sh	error bars are mean ± SEM	Scramble = 42.750 ± 3.953, NLG1 sh = 70.710 ± 3.807	p < 0.0001
Fig. 2F	Unpaired two-tailed t-test	13 mice/ Scramble, 14 mice/ NLG1 sh	error bars are mean ± SEM	Scramble = 13.850 ± 1.126, NLG1 sh = 19.210 ± 1.154	p = 0.0028
Fig. 2G	Unpaired two-tailed t-test	13 mice/ Scramble, 14 mice/ NLG1 sh	error bars are mean ± SEM	Scramble = 65.050 ± 3.260, NLG1 sh = 72.460 ± 1.600	p = 0.0472
Fig. 2I	Unpaired two-tailed t-test	10 mice/ Scramble, 12 mice/ NLG1 sh	error bars are mean ± SEM	Scramble = 20.590 ± 1.606, NLG1 sh = 17.720 ± 2.259	p = 0.2624
Fig. 2J	Unpaired two-tailed t-test	10 mice/ Scramble, 12 mice/ NLG1 sh	error bars are mean ± SEM	Scramble = 3.100 ± 0.277, NLG1 sh = 3.167 ± 0.322	p = 0.8795
Fig. 2K	Unpaired two-tailed t-test	7 mice/ group	error bars are mean ± SEM	Scramble = 43.750 ± 5.640, NLG1 sh = 54.370 ± 4.463	p = 0.1655
Fig. 2L	Unpaired two-tailed t-test	7 mice/ group	error bars are mean ± SEM	Scramble = 13.570 ± 1.462, NLG1 sh = 16.570 ± 1.744	p = 0.2119
Fig. 2N	Unpaired two-tailed t-test	9 mice/ group	error bars are mean ± SEM	Scramble = 25.070 ± 3.294, NLG1 sh = 49.940 ± 7.634	p = 0.0086
Fig. 2O	Unpaired two-tailed t-test	9 mice/ group	error bars are mean ± SEM	Scramble = 3.000 ± 0.408, NLG1 sh = 4.667 ± 0.333	p = 0.0060
Fig. 2P	Unpaired two-tailed t-test	9 mice/ group	error bars are mean ± SEM	Scramble = 35.130 ± 2.599, NLG1 sh = 61.210 ± 8.507	p = 0.0098
Fig. 2Q	Unpaired two-tailed t-test	9 mice/ group	error bars are mean ± SEM	Scramble = 12.670 ± 1.323, NLG1 sh = 18.110 ± 2.170	p = 0.0479
Fig. 2S	Unpaired two-tailed t-test	9 mice/ GFP, 10 mice/ OE	error bars are mean ± SEM	GFP = 50.290 ± 6.096, OE = 28.840 ± 3.313	p = 0.0055
Fig. 2T	Unpaired two-tailed t-test	9 mice/ GFP, 10 mice/ OE	error bars are mean ± SEM	GFP = 5.222 ± 0.494, OE = 3.900 ± 0.277	p = 0.0282
Fig. 2U	Unpaired two-tailed t-test	10 mice/ GFP, 9 mice/ OE	error bars are mean ± SEM	GFP = 61.310 ± 7.545, OE = 41.050 ± 3.346	p = 0.0305
Fig. 2V	Unpaired two-tailed t-test	10 mice/ GFP, 9 mice/ OE	error bars are mean ± SEM	GFP = 18.900 ± 1.269, OE = 13.110 ± 1.060	p = 0.0030

## Sheet: Fig. 3
	TEST USED	n	DESCRIPTIVE STATS		P VALUE
Fig. 3A	unpaired two-tailed t-test	10 neurons/ 3 mice	error bars are mean ± SEM	WT = -79.690 ± 1.629, KO = -81.240 ± 1.185	p = 0.4499
Fig. 3C	Repeated two-way ANOVA followed Fisher's LSD post hoc test	10 neurons/ 3 mice	error bars are mean ± SEM	0 pA(WT = 0.000 ± 0.000, KO = 0.000 ± 0.000), 50 pA(WT = 0.000 ± 0.000, KO = 0.600 ± 0.600), 100 pA(WT = 0.100 ± 0.100, KO = 6.400 ± 2.192), 150 pA(WT = 5.000 ± 1.366, KO = 21.500 ± 2.062), 200 pA(WT = 19.000 ± 1.000, KO = 30.000 ± 1.571)	50 pA (Scramble VS NLG1 sh p = 0.3434), 100 pA (Scramble VS NLG1 sh p = 0.0184), 150 pA (Scramble VS NLG1 sh p < 0.0001), 200 pA (Scramble VS NLG1 sh p < 0.0001)
Fig. 3D	unpaired two-tailed t-test	10 neurons/ 3 mice	error bars are mean ± SEM	WT = 19.000 ± 1.000, KO = 30.000 ± 1.571	p < 0.0001
Fig. 3E	unpaired two-tailed t-test	11 neurons/ 3 scramble mice, 12 neurons/ 3 NLG1 sh mice	error bars are mean ± SEM	Scranble = -78.440 ± 0.359, NLG1 sh = -76.860 ± 0.728	p = 0.0728
Fig. 3G	Repeated two-way ANOVA followed Fisher's LSD post hoc test	10 neurons, 3 mice/ group	error bars are mean ± SEM	0 pA(Scranble = 0.000 ± 0.000, NLG1 sh = 0.000 ± 0.000), 50 pA(Scranble = 0.000 ± 0.000, NLG1 sh = 2.200 ± 2.200), 100 pA(Scranble = 0.000 ± 0.000, NLG1 sh = 9.200 ± 3.648), 150 pA(Scranble = 7.800 ± 2.772, NLG1 sh = 24.000 ± 3.882), 200 pA(Scranble = 19.600 ± 2.207, NLG1 sh = 36.900 ± 4.841)	50 pA (Scramble VS NLG1 sh p = 0.3434), 100 pA (Scramble VS NLG1 sh p = 0.0327) , 150 pA (Scramble VS NLG1 sh p = 0.0036), 200 pA (Scramble VS NLG1 sh p = 0.0065)
Fig. 3H	unpaired two-tailed t-test	10 neurons, 3 mice/ group	error bars are mean ± SEM	Scranble = 19.600 ± 2.207, NLG1 sh = 36.900 ± 4.841	p = 0.0044
Fig. 3K	unpaired two-tailed t-test	12 events/ WT, 13 events/ KO	error bars are mean ± SEM	WT = 4.204 ± 0.373, KO = 3.931 ± 0.160	p = 0.4953
Fig. 3L	unpaired two-tailed t-test	12 events/ WT, 13 events/ KO	error bars are mean ± SEM	WT = 0.221 ± 0.023, KO = 0.286 ± 0.018	p = 0.0352
Fig. 3O	unpaired two-tailed t-test	12 neurons, 3 mice/ group	error bars are mean ± SEM	Scramble = 11.010 ± 0.781, NLG1 sh = 12.060 ± 0.717	p = 0.3332
Fig. 3P	unpaired two-tailed t-test	12 neurons, 3 mice/ group	error bars are mean ± SEM	Scramble = 3.024 ± 0.401, NLG1 sh = 4.793 ± 0.589	p = 0.0211
Fig. 3Q	unpaired two-tailed t-test	10 neurons/ 3 scramble mice, 9 neurons/ 3 NLG1 sh mice	error bars are mean ± SEM	Scramble = 8.683 ± 0.695, NLG1 sh = 8.220 ± 0.441	p = 0.5907
Fig. 3R	unpaired two-tailed t-test	10 neurons/ 3 scramble mice, 9 neurons/ 3 NLG1 sh mice	error bars are mean ± SEM	Scramble = 0.633 ± 0.135, NLG1 sh = 0.693 ± 0.211	p = 0.8105

## Sheet: Fig. 4
	TEST USED	n	DESCRIPTIVE STATS		P VALUE
Fig. 4B	Paired two-tailed t-test	10 mice/ group	error bars are mean ± SEM	Saline = 67.620 ± 5.304, CNO = 22.330 ± 4.542	p < 0.0001
Fig. 4C	Paired two-tailed t-test	10 mice/ group	error bars are mean ± SEM	Saline = 6.500 ± 0.428, CNO = 2.900 ± 0.407	p < 0.0001
Fig. 4D	Paired two-tailed t-test	9 mice/ group	error bars are mean ± SEM	Saline = 60.880 ± 6.747, CNO = 40.690 ± 6.072	p = 0.0192
Fig. 4E	Paired two-tailed t-test	9 mice/ group	error bars are mean ± SEM	Saline = 14.440 ± 1.237, CNO = 9.333 ± 0.850	p = 0.0080
Fig. 4G	Unpaired two-tailed t-test	9 mice/ group	error bars are mean ± SEM	mCherry = 20.130 ± 3.087, CNO = 40.100 ± 5.436	p = 0.0056
Fig. 4H	Unpaired two-tailed t-test	9 mice/ group	error bars are mean ± SEM	mCherry = 3.444 ± 0.294, CNO = 5.667 ± 0.687	p = 0.0090
Fig. 4I	Unpaired two-tailed t-test	9 mice/ group	error bars are mean ± SEM	mCherry = 45.570 ± 3.055, CNO = 47.590 ± 3.982	p = 0.6924
Fig. 4J	Unpaired two-tailed t-test	10 mice/ group	error bars are mean ± SEM	mCherry = 33.810 ± 3.473, CNO = 33.580 ± 4.319	p = 0.9679
Fig. 4K	Unpaired two-tailed t-test	10 mice/ group	error bars are mean ± SEM	mCherry = 10.400 ± 0.980, CNO = 10.600 ± 1.240	p = 0.9007
Fig. 4L	Unpaired two-tailed t-test	10 mice/ group	error bars are mean ± SEM	mCherry = 69.610 ± 3.103, CNO = 71.060 ± 3.709	p = 0.7677
Fig. 4O	Repeated two-way ANOVA followed Fisher's LSD post hoc test	8 mice/ group	error bars are mean ± SEM	0-3 min (mCherry = 1.558 ± 0.831, ChR2 = 2.011 ± 0.886) 3-6min (mCherry = 4.561 ± 1.404, ChR2 = 4.648 ± 2.062) 6-9 min (mCherry = 5.408 ± 2.675, ChR2 = 3.199 ± 2.335) 9-12 min (mCherry = 4.704 ± 2.008, ChR2 = 5.080 ± 2.035) 12-15 min (mCherry = 7.330 ± 3.878, ChR2 = 6.734 ± 3.181) 15-18 min (mCherry = 7.400 ± 3.351, ChR2 = 4.524 ± 1.680) 18-21 min (mCherry = 7.908 ± 4.208, ChR2 = 5.120 ± 2.542) 2…	0-3 min (mCherry VS ChR2 p = 0.9231) 3-6 min (mCherry VS ChR2 p = 0.9854) 6-9 min (mCherry VS ChR2 p = 0.6387) 9-12 min (mCherry VS ChR2 p = 0.9362) 12-15 min (mCherry VS ChR2 p = 0.8991) 15-18 min (mCherry VS ChR2 p = 0.5410) 18-21 min (mCherry VS ChR2 p = 0.5536) 21-24 min (mCherry VS ChR2 p = 0.7904) 24-27 min (mCherry VS ChR2 p = 0.0002)
Fig. 4P	Repeated two-way ANOVA followed Fisher's LSD post hoc test	7 mice/ mCherry, 9 mice/ ChR2	error bars are mean ± SEM	0-5 min (mCherry = 8.750 ± 2.674, ChR2 = 5.756 ± 1.447) 5-10min (mCherry = 9.234 ± 3.161, ChR2 = 7.910 ± 1.261) 10-15 min (mCherry = 9.504 ± 3.262, ChR2 = 6.246 ± 1.924)	0-5 min (mCherry VS ChR2 p = 0.3493) 5-10 min (mCherry VS ChR2 p = 0.7074) 10-15 min (mCherry VS ChR2 p = 0.4097)
Fig. 4Q	Repeated two-way ANOVA followed Fisher's LSD post hoc test	7 mice/ mCherry, 9 mice/ ChR2	error bars are mean ± SEM	0-5 min (mCherry = 7.184 ± 1.948, ChR2 = 5.124 ± 1.327) 5-10min (mCherry = 9.840 ± 2.253, ChR2 = 10.410 ± 1.355) 10-15 min (mCherry = 6.887 ± 3.299, ChR2 = 20.770 ± 4.217)	0-5 min (mCherry VS ChR2 p = 0.4007) 5-10 min (mCherry VS ChR2 p = 0.8330) 10-15 min (mCherry VS ChR2 p = 0.0214)
Fig. 4R	Unpaired two-tailed t-test	8 mice/ group	error bars are mean ± SEM	mCherry = 138.300 ± 19.440, ChR2 = 8.353 ± 1.721	p < 0.0001
Fig. 4S	Unpaired two-tailed t-test	8 mice/ group	error bars are mean ± SEM	mCherry = 0.750 ± 0.313, ChR2 = 3.250 ± 0.366	p = 0.0001
Fig. 4T	Repeated two-way ANOVA followed Fisher's LSD post hoc test	9 mice/ group	error bars are mean ± SEM	0-3 min (mCherry = 0.722 ± 0.407, ChR2 = 0.291 ± 0.291) 3-6min (mCherry = 2.473 ± 1.159, ChR2 = 0.860 ± 0.860) 6-9 min (mCherry = 4.961 ± 2.152, ChR2 = 6.742 ± 3.094) 9-12 min (mCherry = 6.297 ± 1.531, ChR2 = 5.271 ± 3.879) 12-15 min (mCherry = 4.077 ± 2.111, ChR2 = 10.140 ± 4.632) 15-18 min (mCherry = 4.630 ± 2.301, ChR2 = 22.270 ± 6.475) 18-21 min (mCherry = 3.122 ± 2.115, ChR2 = 21.270 ± 4.103…	0-3 min (mCherry VS ChR2 p = 0.9365) 3-6 min (mCherry VS ChR2 p = 0.7655) 6-9 min (mCherry VS ChR2 p = 0.7419) 9-12 min (mCherry VS ChR2 p = 0.8496) 12-15 min (mCherry VS ChR2 p = 0.2629) 15-18 min (mCherry VS ChR2 p = 0.0014) 18-21 min (mCherry VS ChR2 p = 0.0010) 21-24 min (mCherry VS ChR2 p < 0.0001) 24-27 min (mCherry VS ChR2 p = 0.0407)
Fig. 4U	Repeated two-way ANOVA followed Fisher's LSD post hoc test	7 mice/ mCherry, 9 mice/ ChR2	error bars are mean ± SEM	0-3 min (mCherry = 0.714 ± 0.507, ChR2 = 0.718 ± 0.323) 3-6 min (mCherry = 2.747 ± 1.388, ChR2 = 0.937 ± 0.854) 6-9 min (mCherry = 4.567 ± 2.041, ChR2 = 4.633 ± 1.588)	0-3 min (mCherry VS ChR2 p = 0.9955) 3-6 min (mCherry VS ChR2 p = 0.2917) 6-9 min (mCherry VS ChR2 p = 0.9800)
Fig. 4V	Repeated two-way ANOVA followed Fisher's LSD post hoc test	7 mice/ mCherry, 9 mice/ ChR2	error bars are mean ± SEM	0-3 min (mCherry = 3.049 ± 1.188, ChR2 = 9.329 ± 2.819) 3-6 min (mCherry = 5.003 ± 1.701, ChR2 = 27.800 ± 9.273) 6-9 min (mCherry = 4.970 ± 3.893, ChR2 = 9.580 ± 4.107)	0-3 min (mCherry VS ChR2 p = 0.0655) 3-6 min (mCherry VS ChR2 p = 0.0402) 6-9 min (mCherry VS ChR2 p = 0.4290)
Fig. 4W	Unpaired two-tailed t-test	9 mice/ group	error bars are mean ± SEM	mCherry = 94.550 ± 19.910, ChR2 = 38.340 ± 10.260	p = 0.0232
Fig. 4X	Unpaired two-tailed t-test	9 mice/ group	error bars are mean ± SEM	mCherry = 1.778 ± 0.760, ChR2 = 6.889 ± 0.824	p = 0.0003

## Sheet: Fig. 5
	TEST USED	n	DESCRIPTIVE STATS		P VALUE
Fig. 5C	Unpaired two-tailed t-test	7 events/ WT, 6 events/ KO	error bars are mean ± SEM	WT = 0.167 ± 0.022, KO = 0.268 ± 0.013	p = 0.0029
Fig. 5D	Unpaired two-tailed t-test	7 events/ WT, 6 events/ KO	error bars are mean ± SEM	WT = 29.710 ± 6.252, KO = 51.500 ± 5.937	p = 0.0295
Fig. 5E	Correlation matrix analysis	7 events	error bars are mean ± SEM		r2 = 0.8063, p = 0.0060
Fig. 5F	Correlation matrix analysis	6 events	error bars are mean ± SEM		r2 = 0.0621, p = 0.6339
Fig. 5G	Correlation matrix analysis	13 events	error bars are mean ± SEM		r2 = 0.6690, p = 0.0006
Fig. 5H	Unpaired two-tailed t-test	7 events/ WT, 6 events/ KO	error bars are mean ± SEM	WT = 2.286 ± 0.474, KO = 3.833 ± 0.307	p = 0.0232
Fig. 5I	Correlation matrix analysis	7 events	error bars are mean ± SEM		r2 = 0.8949, p = 0.0013
Fig. 5J	Correlation matrix analysis	6 events	error bars are mean ± SEM		r2 = 0.0417, p = 0.6981
Fig. 5K	Correlation matrix analysis	13 events	error bars are mean ± SEM		r2 = 0.6953, p = 0.0004
Fig. 5M	Repeated one-way ANOVA followed Fisher's LSD post hoc test	8 events	error bars are mean ± SEM	Average = 0.817 ± 0.153, Pre = 1.096 ± 0.185, Post = 0.643 ± 0.143	Average vs. Pre p = 0.0091, Average vs. Post p = 0.1721, Pre vs. Post p = 0.0090
Fig. 5N	Repeated one-way ANOVA followed Fisher's LSD post hoc test	9 events	error bars are mean ± SEM	Average = 0.807 ± 0.085, Pre = 0.802 ± 0.110, Post = 0.491 ± 0.068	Average vs. Pre p = 0.9525, Average vs. Post p = 0.0049, Pre vs. Post p = 0.0061

## Sheet: Fig. 6
	TEST USED	n	DESCRIPTIVE STATS		P VALUE
Fig. 6C	Unpaired two-tailed t-test	5 events/ group	error bars are mean ± SEM	WT = 0.259 ± 0.025, KO = 0.323 ± 0.017	p = 0.0672
Fig. 6D	Unpaired two-tailed t-test	5 events/ group	error bars are mean ± SEM	WT = 34.600 ± 8.846, KO = 108.400 ± 27.70 0	p = 0.0348
Fig. 6E	Unpaired two-tailed t-test	5 events/ group	error bars are mean ± SEM	WT = 3.000 ± 0.707, KO = 11.400 ± 2.786	p = 0.0192
Fig. 6F	Correlation matrix analysis	10 events	error bars are mean ± SEM		r2 = 0.2957, p = 0.1042
Fig. 6G	Correlation matrix analysis	10 events	error bars are mean ± SEM		r2 = 0.3150, p = 0.0914
Fig. 6J	Correlation matrix analysis	10 events	error bars are mean ± SEM		r2 = 0.6113, p = 0.0075
Fig. 6K	Correlation matrix analysis	10 events	error bars are mean ± SEM		r2 = 0.6164, p = 0.0071
Fig. 6L	Unpaired two-tailed t-test	5 events/ group	error bars are mean ± SEM	WT = 16.800 ± 3.277, KO = 30.800 ± 2.853	p = 0.0122
Fig. 6N	Paired two-tailed t-test	5 events	error bars are mean ± SEM	Average = 2.015 ± 0.377, Latent period = 3.000 ± 0.316	p = 0.0208
Fig. 6O	Paired two-tailed t-test	5 events	error bars are mean ± SEM	Average = 2.943 ± 0.275, Latent period = 3.800 ± 0.200	p = 0.0499

## Sheet: Fig. 7
	TEST USED	n	DESCRIPTIVE STATS		P VALUE
Fig. 7B	Unpaired two-tailed t-test	6 mice/ NLG1, 7 mice/ D1R, 6 mice/ D2R, 8 mice/ p-PKC, 8 mice/ PKC, 7 mice/ GluA1, 7 mice/GluA2, 7 mice/ NR1, 6 mice/ NR2A, 6 mice/ NR2B	error bars are mean ± SEM	NLG1( WT = 1.000 ± 0.000, KO = 0.042 ± 0.006) D1R(WT = 1.000 ± 0.000, KO = 0.972 ± 0.090) D2R(WT = 1.000 ± 0.000, KO = 0.987 ± 0.079) p-PKC(WT = 1.000 ± 0.000, KO = 1.795 ± 0.284) PKC(WT = 1.000 ± 0.000, KO = 1.055 ± 0.139) GluA1(WT = 1.000 ± 0.000, KO = 1.053 ± 0.106) GluA2(WT = 1.000 ± 0.000, KO = 1.077 ± 0.103) NR1(WT = 1.000 ± 0.000, KO = 1.156 ± 0.092) NR2A(WT = 1.000 ± 0.000, KO = 0.957 ± 0…	NLG1 p < 0.0001, D1R p = 0.7624, D2R p = 0.8763, p-PKC p = 0.0143, PKC p = 0.6975, GluA1 p = 0.6243, GluA2 p = 0.4674, NR1 p = 0.1162, NR2A p = 0.6643, NB2B p = 0.7102
Fig. 7D	Unpaired two-tailed t-test	6 mice/ group	error bars are mean ± SEM	NLG1(Scramble = 1.000 ± 0.000, NLG1 sh = 0.727 ± 0.081) p-PKC(Scramble = 1.000 ± 0.000, NLG1 sh = 1.502 ± 0.205) PKC(Scramble = 1.000 ± 0.000, NLG1 sh = 1.018 ± 0.049)	NLG1 p = 0.0073, p-PKC p = 0.0344, PKC p = 0.7209
Fig. 7E	Unpaired two-tailed t-test	10/ WT, 9/ KO	error bars are mean ± SEM	WT = -78.460 ± 1.384, KO = -77.870 ± 1.297	p = 0.7636
Fig. 7G	Repeated two-way ANOVA followed Fisher's LSD post hoc test	10/ WT, 9/ KO	error bars are mean ± SEM	0 pA(WT = 0.000 ± 0.000, KO = 0.000 ± 0.000), 50 pA(WT = 0.000 ± 0.000, KO = 0.000 ± 0.000), 100 pA(WT = 2.400 ± 1.137, KO = 2.444 ± 1.625), 150 pA(WT = 11.500 ± 1.088, KO = 12.780 ± 1.535), 200 pA(WT = 19.100 ± 1.312, KO = 21.670 ± 1.291)	100 pA (WT VS KO p = 0.9824), 150 pA (WT VS KO p = 0.5075), 200 pA (WT VS KO p = 0.1812)
Fig. 7H	Unpaired two-tailed t-test two-tailed t-test	10/ WT, 9/ KO	error bars are mean ± SEM	WT = 19.100 ± 1.312, KO = 21.670 ± 1.291	p = 0.1827
Fig. 7J	Unpaired two-tailed t-test	8 mice/ group	error bars are mean ± SEM	Saline = 65.060 ± 13.000, CNO = 33.420 ± 6.150	p = 0.0451
Fig. 7K	Unpaired two-tailed t-test	8 mice/ group	error bars are mean ± SEM	Saline = 5.750 ± 0.648, CNO = 3.375 ± 0.461	p = 0.0098
Fig. 7L	Unpaired two-tailed t-test	8 mice/ group	error bars are mean ± SEM	Saline = 51.350 ± 6.290, CNO = 24.440 ± 7.678	p = 0.0169
Fig. 7M	Unpaired two-tailed t-test	8 mice/ group	error bars are mean ± SEM	Saline = 17.000 ± 1.535, CNO = 7.750 ± 2.042	p = 0.0028
Fig. 7O	one-way ANOVA test followed Fisher's LSD post hoc test	6 mice/ GFP, 5 mice/ Full, 6 mice/ ΔPBD, 5 mice/ L269P	error bars are mean ± SEM	GFP = 1.000 ± 0.000, Full = 0.438 ± 0.146, ΔPBD = 0.405 ± 0.112, L269P = 1.253 ± 0.230	GFP VS Full p = 0.0141, GFP VS ΔPBD p = 0.0185, GFP VS L269P p = 0.7252
Fig. 7P	one-way ANOVA test followed Fisher's LSD post hoc test	9 mice/ GFP 9 mice/ Full 9 mice/ ΔPBD 8 mice/ L269P	error bars are mean ± SEM	GFP = 57.190 ± 8.305, Full = 28.590 ± 4.472, ΔPBD = 28.440 ± 4.417, L269P = 42.540 ± 7.245	GFP VS Full p = 0.0027, GFP VS ΔPBD p = 0.0026, GFP VS L269P p = 0.1154
Fig. 7Q	one-way ANOVA test followed Fisher's LSD post hoc test	9 mice/ GFP 9 mice/ Full 9 mice/ ΔPBD 8 mice/ L269P	error bars are mean ± SEM	GFP = 6.333 ± 0.527, Full = 3.667 ± 0.373, ΔPBD = 4.556 ± 0.444, L269P = 5.875 ± 0.611	GFP VS Full p = 0.0005, GFP VS ΔPBD p = 0.0141, GFP VS L269P p = 0.5199
Fig. 7R	one-way ANOVA test followed Fisher's LSD post hoc test	9 mice/ GFP 9 mice/ Full 9 mice/ ΔPBD 8 mice/ L269P	error bars are mean ± SEM	GFP = 9.371 ± 1.394, Full = 7.960 ± 0.946, ΔPBD = 6.332 ± 0.962, L269P = 7.656 ± 1.235	GFP VS Full p = 0.3844, GFP VS ΔPBD p = 0.0667, GFP VS L269P p = 0.3060
Fig. 7S	one-way ANOVA test followed Fisher's LSD post hoc test	9 mice/ GFP 9 mice/ Full 9 mice/ ΔPBD 8 mice/ L269P	error bars are mean ± SEM	GFP = 64.840 ± 5.695, Full = 35.150 ± 5.281, ΔPBD = 38.270 ± 5.506, L269P = 76.510 ± 9.362	GFP VS Full p = 0.0026, GFP VS ΔPBD p = 0.0062, GFP VS L269P p = 0.2213
Fig. 7T	one-way ANOVA test followed Fisher's LSD post hoc test	9 mice/ GFP 9 mice/ Full 9 mice/ ΔPBD 8 mice/ L269P	error bars are mean ± SEM	GFP = 18.560 ± 1.324, Full = 11.670 ± 1.641, ΔPBD = 13.440 ± 1.529, L269P = 17.250 ± 0.840	GFP VS Full p = 0.0013, GFP VS ΔPBD p = 0.0133, GFP VS L269P p = 0.5198
Fig. 7U	one-way ANOVA test followed Fisher's LSD post hoc test	9 mice/ GFP 9 mice/ Full 9 mice/ ΔPBD 8 mice/ L269P	error bars are mean ± SEM	GFP = 3.543 ± 0.274, Full = 3.170 ± 0.353, ΔPBD = 2.845 ± 0.175, L269P = 4.355 ± 0.370	GFP VS Full p = 0.3771, GFP VS ΔPBD p = 0.1037, GFP VS L269P p = 0.0683
