# Supplementary material for: Neuroligin 1 regulates autistic-like repetitive behavior through modulating the excitability of striatal D2 expressing medium spiny neurons
Source: Research Square preprint supplement (doi:10.21203/rs.3.rs-4113756/v1), 2024-07-11
Supplement: Supplementary file 3 [file 3b3e59bab3419084539389ec.xlsx]

## Sheet: Sheet1
Statistics for D2-MSN action potentials	WT			NLG1 KO
	Mean	SEM	n	Mean	SEM	n	t-value	p-value
Peak amplitude (mV)	95	1.87	10	90.33	2.12	10	1.653	0.116
Time to peak (ms)	1.66	0.03	10	1.61	0.03	10	1.165	0.259
Antipeak amplitude (mV)	12.17	1.11	10	10.6	1.79	10	0.744	0.467
Half-width (ms)	1.93	0.11	10	1.86	0.07	10	0.536	0.598
Area (mV ∙ ms)	193.89	8.32	10	177.62	5.8	10	1.603	0.126
Rise tau (ms)	1.127	0.19	10	1.178	0.25	10	0.165	0.871
Decay tau (ms)	20.33	4.18	10	14.9	2.99	10	1.058	0.304
